# Supplementary material
Source: PubMed Central journal article supplement (PMC3183351)

## Supporting Information For the Manuscript:

### **Evaluation of Several Two-Step Scoring Functions Based on Linear Interaction Energy, Effective Ligand Size, and Empirical Pair Potentials for Prediction of Protein-Ligand Binding Geometry and Free Energy.**

Obaidur Rahaman,<sup>1</sup> Trilce P. Estrada<sup>2</sup>, Douglas J. Doren,<sup>1</sup> Michela Taufer,<sup>2</sup> Charles L. Brooks III<sup>3</sup> and Roger S. Armen<sup>4\*</sup>

<sup>1</sup>Department of Chemistry and Biochemistry, University of Delaware, Newark, Delaware 19716

<sup>2</sup>Department of Computer and Information Sciences, University of Delaware, Newark, Delaware

19716 <sup>3</sup>Department of Chemistry, 930 N. University Ave, University of Michigan, Ann Arbor,

MI 48109 <sup>4</sup>Department of Pharmaceutical Sciences, School of Pharmacy, Thomas Jefferson University, 130 S. 9<sup>th</sup> St, Ste 1510, Philadelphia, PA 19107.

Page S2. Cross-validation groups for the dataset LPDB259 and LPDB160.

Page S3. Table S1. Data look-up tables for distance dependent pair potentials  $W_{\text{pair}}(r)$ .

Page S4. Table S2. Weights  $\lambda_{\text{pair}}$  for the scoring function S3w fit to LPDB259.

Page S5. Table S3. Enrichment Factors and ROC curves.

Page S6. Figure S1. Performance of S1, S2, S2h as a function of cutoff distance.

Page S7. Figure S2. distance dependent pair potentials  $W_{\text{pair}}(r)$ .

## Cross-validation groups for the dataset LPDB259 and LPDB160.

### LPDB259:

(group1): 1a9m, 1abe, 1adb, 1adc, 1aeq, 1aet, 1avn, 1b6k, 1b6m, 1ba8, 1bai, 1bid, 1cil, 1cnx, 1did, 1dif, 1dwc, 1etr, 1fkf, 1fkg, 1flr, 1g2k, 1hhg, 1hhi, 1hpo, 1hsg, 1hsh, 1htf, 1hvh, 1hwr, 1ivp, 1mcf, 1mch, 1nnb, 1okl, 1ppc, 1tnh, 1tni, 1vac, 1xig, 2dbl, 2er7, 2web, 2wec, 2xis, 3ptb, 4er2, 4er4, 5cpp, 5hvp, 5tmn, 8abp.

(group2): 1a30, 1a4k, 1a50, 1aaq, 1ac4, 1ae8, 1aed, 1aek, 1aer, 1afl, 1atl, 1bwa, 1bwb, 1bxo, 1bzm, 1c83, 1c87, 1c8k, 1cbs, 1cbx, 1cny, 1cvu, 1d3h, 1dbb, 1dbk, 1dbm, 1die, 1dwd, 1ela, 1ets, 1g35, 1hii, 1hiv, 1hps, 1hvp, 1hpx, 1hvj, 1hvk, 1k6p, 1ldm, 1lyb, 1pph, 1rne, 1sre, 2cpp, 2ifb, 3tmn, 4tln, 6abp, 6tmn, 7abp, 7hvp.

(group3): 1aeb, 1aee, 1aes, 1aeu, 1aev, 1anf, 1apu, 1apv, 1b6j, 1b6l, 1bim, 1bmn, 1bto, 1bv9, 1byg, 1cin, 1cpi, 1ctr, 1d3p, 1d4l, 1d4p, 1dbj, 1ent, 1fax, 1fkn, 1gno, 1hbv, 1hge, 1hhk, 1hii, 1hld, 1hxb, 1hxw, 1mcj, 1mcs, 1nsc, 1rbp, 2tsc, 2upj, 2wea, 3er3, 3er5, 4dfr, 4er1, 4hmg, 4tmn, 5abp, 5cna, 5tln, 9aat, 9abp, 9hvp.

(group4): 1a4w, 1abf, 1aeg, 1aeh, 1aen, 1afk, 1ajv, 1aoe, 1apw, 1b38, 1bap, 1bdr, 1bmm, 1c84, 1c88, 1cnw, 1ctt, 1dog, 1dwb, 1ebg, 1eed, 1ejn, 1ett, 1hdt, 1hew, 1hgj, 1hhj, 1hos, 1hrn, 1htg, 1ida, 1k6c, 1ldy, 1lgr, 1mcb, 1nsd, 1ppl, 1pso, 1sbp, 1tmn, 1tng, 1tnj, 2ctc, 2gbp, 2phh, 2vaa, 2vab, 3bto, 4hvp, 4ts1, 6cpa, 8cpp.

(group5): 1a07, 1ac0, 1ac8, 1add, 1adf, 1aef, 1aem, 1ajx, 1apb, 1apt, 1b39, 1bil, 1bra, 1bv7, 1c2t, 1cim, 1d3d, 1d4y, 1dih, 1dmp, 1elc, 1epo, 1epp, 1hgh, 1hsl, 1hte, 1hvi, 1hvl, 1hvr, 1lde, 1mnc, 1pgp, 1ppk, 1ppm, 1stp, 1tnk, 1tnl, 1tpp, 1ulb, 1uvs, 2acs, 2er6, 2ypi, 3cpa, 4phv, 5er2, 5tim, 6cpp, 7cpa, 7cpp, 7upj.

### LPDB160:

(group1): 1aaq, 1adc, 1aee, 1aek, 1ajv, 1apu, 1avn, 1elc, 1ets, 1ets, 1hhg, 1hhj, 1hii, 1hvi, 1hvl, 1nsc, 1pgp, 1ppl, 1rbp, 1rne, 2cpp, 2ctc, 2er6, 2phh, 4er2, 4er4, 5cna, 5er2, 5hvp, 7hvp, 7upj, 9aat, 9hvp.

(group2): 1abe, 1abf, 1aev, 1bap, 1bra, 1ctt, 1dbb, 1dif, 1dih, 1dog, 1dwc, 1eed, 1epo, 1etr, 1ett, 1hvp, 1mcf, 1mch, 1mcj, 1ppc, 1pso, 1sre, 1tnk, 2acs, 2er7, 2tsc, 2upj, 2ypi, 3tmn, 4dfr, 4hmg, 6abp.

(group3): 1a4w, 1ac8, 1adf, 1aed, 1aeg, 1aen, 1aes, 1ajx, 1apb, 1apt, 1apv, 1dwd, 1ebg, 1hdt, 1hhk, 1hos, 1hps, 1hvk, 1ldm, 1lgr, 1nsd, 1ppk, 1stp, 1tnh, 2ifb, 3ptb, 4phv, 5abp, 5cpp, 5tim, 7cpp, 8abp.

(group4): 1add, 1aeb, 1aeh, 1aeq, 1aet, 1bid, 1bmn, 1dbm, 1dwb, 1ela, 1ent, 1hii, 1hsg, 1hsl, 1htf, 1hvj, 1hvr, 1lyb, 1mcs, 1nnb, 1pph, 1ppm, 1tni, 1tnj, 1ulb, 1uvs, 1xig, 2xis, 4er1, 4hvp, 6cpp, 7abp.

(group5): 1ac4, 1ae8, 1aef, 1aem, 1aer, 1aeu, 1apw, 1bmm, 1dbj, 1dbk, 1epp, 1fkf, 1gno, 1hbv, 1hpx, 1hte, 1htg, 1mcb, 1tng, 1tnl, 1tpp, 1vac, 2dbl, 2gbp, 2wea, 2web, 2wec, 3er3, 3er5, 4ts1, 8cpp, 9abp.

Table S1. Data look-up tables for distance dependent pair potentials  $W_{\text{pair}}(r)$ .

| Distance | OH    | CH    | HH    | NH    | CC    | ON    | OC    | NC    | OO    | other |
|----------|-------|-------|-------|-------|-------|-------|-------|-------|-------|-------|
| 1.00     |       |       |       |       |       |       |       |       |       |       |
| 1.25     |       |       |       |       |       |       |       |       |       |       |
| 1.50     |       |       |       |       |       |       |       |       |       |       |
| 1.75     | -2.25 |       | 0.61  |       |       |       |       |       |       |       |
| 2.00     | -2.27 |       | 0.87  | 2.00  |       |       |       |       |       | 2.00  |
| 2.25     | -1.40 |       | -0.80 | 1.56  |       |       |       |       |       | -0.37 |
| 2.50     | -0.92 | 2.00  | -1.01 | 1.60  |       |       |       |       |       | 0.94  |
| 2.75     | -1.06 | 0.99  | -0.70 | 0.42  |       | -0.69 |       |       | -0.17 | 0.48  |
| 3.00     | -0.57 | 0.11  | -0.34 | 0.06  |       | -1.49 | 2.00  |       | -1.36 | 0.36  |
| 3.25     | -0.25 | -0.20 | -0.15 | 0.10  | 2.00  | -0.82 | 0.31  | 1.93  | -0.68 | 0.07  |
| 3.50     | -0.13 | -0.16 | -0.08 | 0.05  | 1.80  | -0.07 | -0.37 | 1.08  | -0.44 | 0.12  |
| 3.75     | 0.06  | -0.06 | -0.03 | 0.03  | 0.51  | 0.18  | -0.44 | 0.28  | -0.16 | 0.06  |
| 4.00     | 0.16  | 0.00  | -0.02 | 0.02  | 0.07  | 0.26  | -0.33 | 0.05  | 0.08  | -0.03 |
| 4.25     | 0.11  | -0.03 | 0.02  | -0.03 | -0.01 | 0.14  | -0.10 | 0.07  | 0.18  | -0.07 |
| 4.50     | 0.10  | -0.04 | 0.03  | -0.01 | -0.08 | 0.09  | 0.03  | 0.13  | 0.21  | -0.01 |
| 4.75     | 0.10  | -0.01 | 0.02  | 0.01  | -0.12 | 0.00  | 0.05  | 0.06  | 0.22  | -0.15 |
| 5.00     | 0.11  | 0.02  | 0.01  | 0.06  | -0.17 | -0.03 | 0.07  | -0.10 | -0.16 | -0.05 |
| 5.25     | 0.09  | 0.02  | 0.02  | 0.00  | -0.14 | -0.12 | 0.08  | -0.16 | -0.04 | -0.03 |
| 5.50     | 0.02  | 0.00  | 0.06  | -0.04 | -0.10 | 0.10  | 0.04  | -0.18 | 0.09  | 0.10  |
| 5.75     | 0.03  | -0.01 | 0.07  | -0.05 | -0.10 | 0.19  | -0.01 | -0.15 | 0.18  | 0.02  |
| 6.00     | 0.03  | 0.00  | 0.06  | -0.05 | -0.11 | 0.22  | 0.01  | -0.14 | 0.19  | -0.02 |

Table S2. Weights  $\lambda_{\text{pair}}$  for the scoring function S3w fit to LPDB259.

| OH    | CH    | HH    | NH    | CC   | ON    | OC   | NC   | OO    |
|-------|-------|-------|-------|------|-------|------|------|-------|
| 0.380 | 3.994 | 0.000 | 7.727 | 0.00 | 1.428 | 0.00 | 0.00 | 0.456 |

Table S3. Enrichment Factors and ROC curves.

| all poses | re-rank   | LPDB  | Rank      | all MW  | True EF | Low MW  | Low MW  | High MW | all MW  | True AUC | Low MW  | Low MW  | High MW |
|-----------|-----------|-------|-----------|---------|---------|---------|---------|---------|---------|----------|---------|---------|---------|
|           | top5      | DP    |           | 180-700 | 320-450 | 180-375 | 320-375 | 375-450 | 180-700 | 320-450  | 180-375 | 320-375 | 375-450 |
| Step1     | Step1     | Step1 | Step2     | <EF>    | <EF>    | <EF>    | <EF>    | <EF>    | AUC     | AUC      | AUC     | AUC     | AUC     |
| LIE(Rdie) | LIE(Rdie) | -1.53 | LIE(GBMV) | 7.1     | 1.0     | 0.6     | 0.9     | 1.1     | 0.53    | 0.54     | 0.51    | 0.58    | 0.53    |
| LIE(Rdie) | LIE(GBMV) | -1.62 | LIE(GBMV) | 7.3     | 1.4     | 1.1     | 1.6     | 1.2     | 0.54    | 0.55     | 0.49    | 0.57    | 0.60    |
| Rdie      | Rdie      | -1.21 | LIE(GBMV) | 5.9     | 1.2     | 1.2     | 1.5     | 1.0     | 0.60    | 0.60     | 0.60    | 0.64    | 0.57    |
| Rdie      | LIE(GBMV) | -1.62 | LIE(GBMV) | 7.2     | 1.8     | 1.4     | 2.1     | 1.3     | 0.59    | 0.60     | 0.55    | 0.62    | 0.62    |
| LIE(Rdie) | LIE(Rdie) | -1.53 | S1        | 11.6    | 7.9     | 1.4     | 2.1     | 17.0    | 0.50    | 0.57     | 0.44    | 0.52    | 0.75    |
| LIE(Rdie) | LIE(GBMV) | -1.62 | S1        | 11.9    | 8.0     | 1.9     | 2.8     | 16.7    | 0.52    | 0.59     | 0.45    | 0.53    | 0.80    |
| Rdie      | Rdie      | -1.21 | S1        | 10.7    | 4.6     | 1.5     | 1.6     | 9.4     | 0.60    | 0.63     | 0.52    | 0.60    | 0.78    |
| Rdie      | LIE(GBMV) | -1.62 | S1        | 11.2    | 6.8     | 1.7     | 1.8     | 14.4    | 0.55    | 0.62     | 0.49    | 0.57    | 0.82    |
| LIE(Rdie) | LIE(Rdie) | -1.53 | S2        | 4.6     | 5.9     | 6.2     | 8.6     | 3.2     | 0.66    | 0.72     | 0.69    | 0.78    | 0.64    |
| LIE(Rdie) | LIE(GBMV) | -1.62 | S2        | 5.1     | 6.6     | 6.3     | 8.8     | 4.1     | 0.68    | 0.75     | 0.69    | 0.77    | 0.73    |
| Rdie      | Rdie      | -1.21 | S2        | 3.8     | 3.4     | 4.8     | 6.1     | 0.7     | 0.64    | 0.67     | 0.61    | 0.66    | 0.72    |
| Rdie      | LIE(GBMV) | -1.62 | S2        | 3.8     | 4.5     | 5.4     | 7.5     | 1.4     | 0.66    | 0.71     | 0.65    | 0.72    | 0.71    |
| LIE(Rdie) | LIE(Rdie) | -1.53 | S2h       | 2.1     | 1.0     | 1.4     | 1.5     | 0.6     | 0.62    | 0.61     | 0.63    | 0.65    | 0.58    |
| LIE(Rdie) | LIE(GBMV) | -1.62 | S2h       | 2.6     | 1.6     | 1.8     | 2.2     | 1.1     | 0.64    | 0.65     | 0.63    | 0.66    | 0.64    |
| Rdie      | Rdie      | -1.21 | S2h       | 1.4     | 0.8     | 0.7     | 0.9     | 0.7     | 0.60    | 0.59     | 0.59    | 0.60    | 0.60    |
| Rdie      | LIE(GBMV) | -1.62 | S2h       | 2.6     | 1.6     | 1.8     | 2.2     | 1.1     | 0.64    | 0.65     | 0.63    | 0.66    | 0.64    |
| LIE(Rdie) | LIE(Rdie) | -1.53 | S3        | 1.2     | 0.5     | 0.0     | 0.0     | 1.3     | 0.44    | 0.43     | 0.36    | 0.36    | 0.59    |
| LIE(Rdie) | LIE(GBMV) | -1.62 | S3        | 1.8     | 1.0     | 0.3     | 0.4     | 1.9     | 0.46    | 0.43     | 0.39    | 0.39    | 0.54    |
| Rdie      | Rdie      | -1.21 | S3        | 1.0     | 0.8     | 0.2     | 0.3     | 1.8     | 0.41    | 0.40     | 0.36    | 0.36    | 0.48    |
| Rdie      | LIE(GBMV) | -1.62 | S3        | 1.8     | 1.0     | 0.3     | 0.4     | 1.9     | 0.46    | 0.43     | 0.39    | 0.39    | 0.54    |
| LIE(Rdie) | LIE(Rdie) | -1.53 | S4        | 1.2     | 0.8     | 1.5     | 1.2     | 0.2     | 0.60    | 0.61     | 0.64    | 0.66    | 0.54    |
| LIE(Rdie) | LIE(GBMV) | -1.62 | S4        | 1.1     | 0.7     | 1.3     | 1.1     | 0.0     | 0.56    | 0.57     | 0.60    | 0.62    | 0.50    |
| Rdie      | Rdie      | -1.21 | S4        | 0.4     | 0.2     | 0.4     | 0.3     | 0.3     | 0.49    | 0.50     | 0.52    | 0.51    | 0.48    |
| Rdie      | LIE(GBMV) | -1.62 | S4        | 1.1     | 0.7     | 1.3     | 1.1     | 0.0     | 0.56    | 0.57     | 0.60    | 0.62    | 0.50    |

Figure S1. Performance of S1, S2, S2h as a function of cutoff distance.

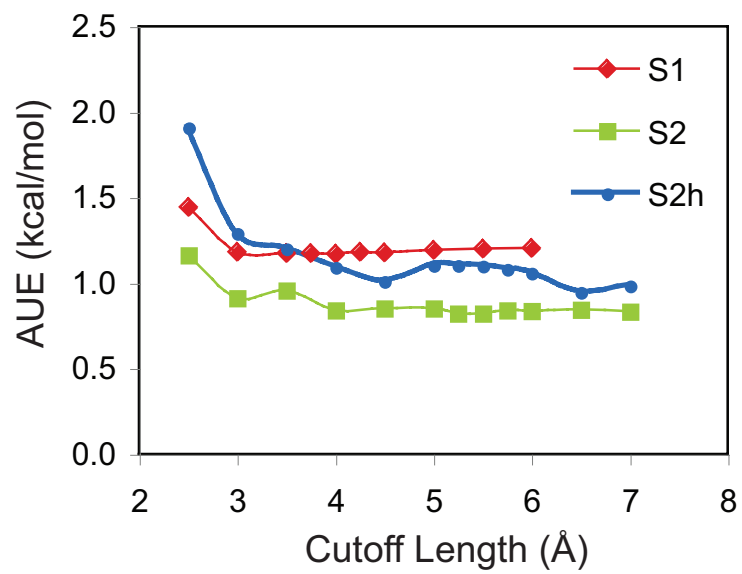

Figure S2. distance dependent pair potentials  $W_{\text{pair}}(r)$ .

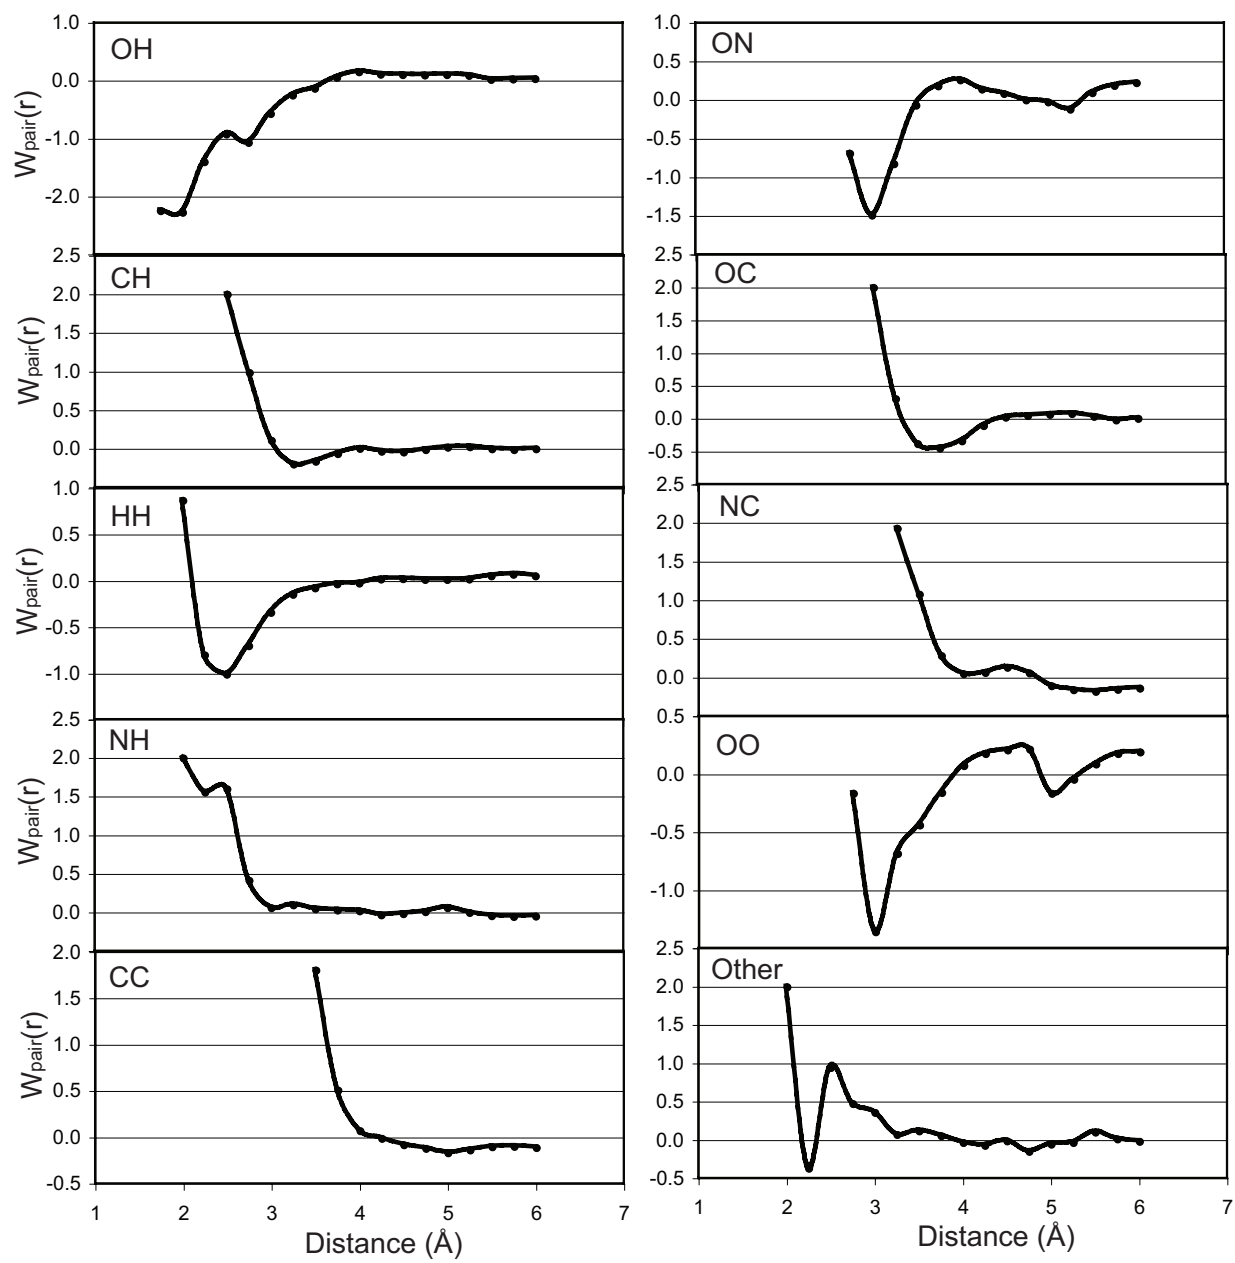

Supplement: NIHMS301889-supplement-1_si_001.pdf [file NIHMS301889-supplement-1_si_001.pdf]
